# Supplementary material for: Intracellular delivery of a molecularly imprinted peroxidase mimicking DNAzyme for selective oxidation
Source: Royal Society of Chemistry journal article supplement (doi:10.1039/c8mh00453f), 2018-01-01
Supplement: c8mh00453f1.pdf [file c8mh00453f1.pdf]

**Electronic Supplementary Information**

**Intracellular delivery of a molecularly imprinted peroxidase mimicking DNAzyme  
for selective oxidation**

Zijie Zhang and Juewen Liu\*

Department of Chemistry, Waterloo Institute for Nanotechnology

University of Waterloo, Waterloo, Ontario, N2L 3G1, Canada

Email: [liujw@uwaterloo.ca](mailto:liujw@uwaterloo.ca)

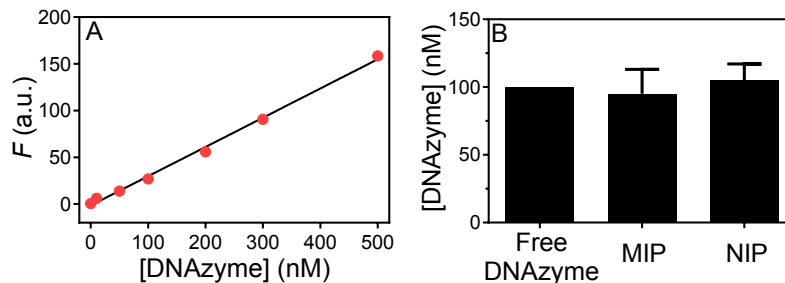

**Figure S1.** (A) The standard curve for determining the concentration of DNAzyme in the nanogels using thiazole orange binding dye. (B) The determined concentrations of DNAzyme in the MIP and NIP nanogels. Thiazole orange (3  $\mu\text{M}$ ) were used for all the tests in the buffer A (20 mM HEPES, pH 7.4, NaCl 100 mM, KCl 10 mM) at 25  $^{\circ}\text{C}$ . For this experiment, different concentration of DNAzyme (0-500 nM) were respectively mixed with 3  $\mu\text{M}$  of thiazole orange dye in the buffer A and then the fluorescence measured using the Varian Eclipse fluorescence spectrometer (Agilent Technologies, Santa Clara, CA) with excitation at 500 nm at 25  $^{\circ}\text{C}$ . The intensities at 535 nm were monitored.
